# Supplementary material for: The high expression of ADRM1 in hepatocellular carcinoma is closely related to tumor immune infiltration and is regulated by miR-891a-5p
Source: Springer Nature journal article supplement (doi:10.1038/s41598-024-64928-2), 2024-06-18
Supplement: MOESM2 [file 41598_2024_64928_MOESM2_ESM.pdf]

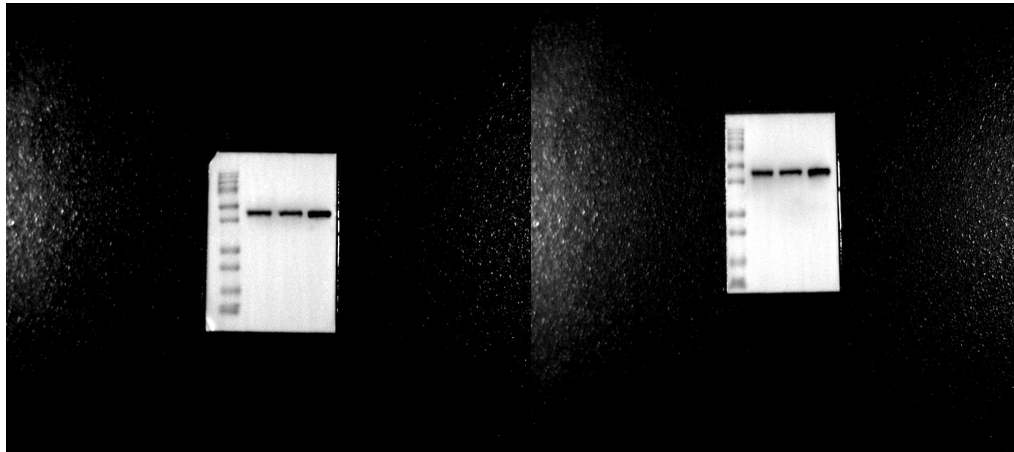

mir891a-5p mimic

mir891a-5p mimic

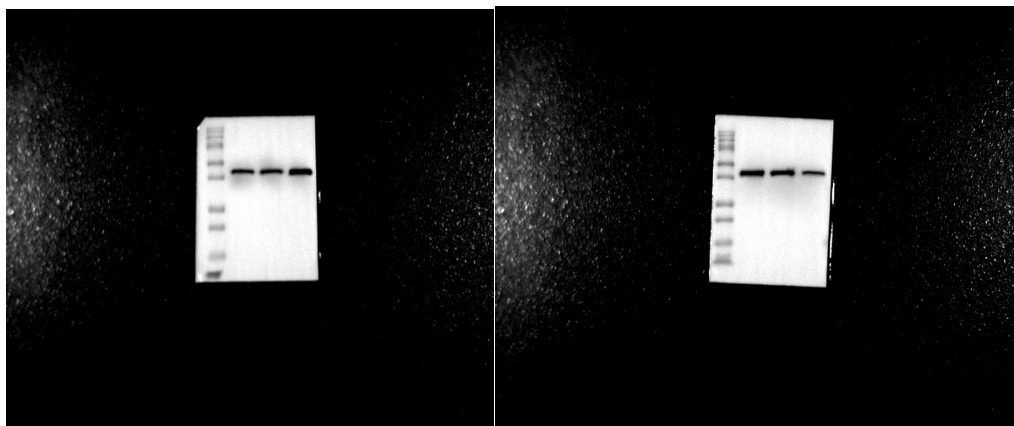

mir891a-5p mimic

mir-8941a-5p inhibitor

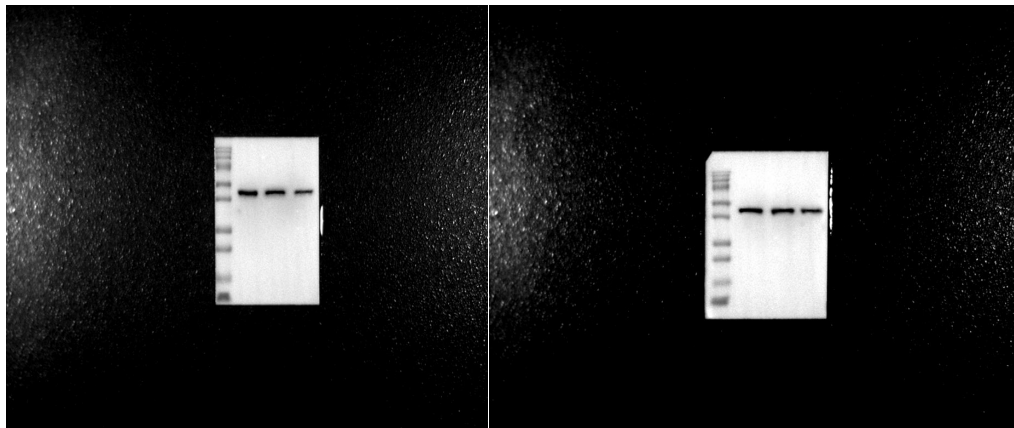

mir-8941a-5p inhibitor

mir-8941a-5p inhibitor

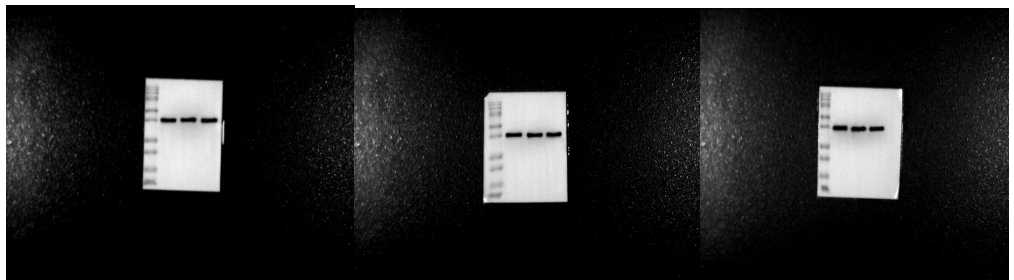

$\beta$ -actin

$\beta$ -actin

$\beta$ -actin
